# Supplementary material for: IgG4/IgG RNA ratio does not accurately discriminate IgG4-related disease from pancreatobiliary cancer
Source: PubMed Central journal article supplement (PMC7332528; doi:10.1016/j.jhepr.2020.100116), 2020-04-14
Supplement: mmc1.pdf [file mmc1.pdf]

## JHEP Reports

### CTAT methods

Tables for a “Complete, Transparent, Accurate and Timely account” (CTAT) are now mandatory for all revised submissions. The aim is to enhance the reproducibility of methods.

- Only include the parts relevant to your study
- Refer to the CTAT in the main text as ‘Supplementary CTAT Table’
- Do not add subheadings
- Add as many rows as needed to include all information
- Only include one item per row

If the CTAT form is not relevant to your study, please outline the reasons why:

|  |
|--|
|  |
|--|

#### 1.1 Antibodies

| Name | Citation | Supplier | Cat no. | Clone no. |
|------|----------|----------|---------|-----------|
| N.A. |          |          |         |           |

#### 1.2 Cell lines

| Name | Citation | Supplier | Cat no. | Passage no. | Authentication test method |
|------|----------|----------|---------|-------------|----------------------------|
| N.A. |          |          |         |             |                            |

#### 1.3 Organisms

| Name | Citation | Supplier | Strain | Sex | Age | Overall n number |
|------|----------|----------|--------|-----|-----|------------------|
| N.A. |          |          |        |     |     |                  |

#### 1.4 Sequence based reagents

| Name                             | Sequence                        | Supplier |
|----------------------------------|---------------------------------|----------|
| one universal Ig forward primer, | (5'-GCTGCCTGGTCAAG GACTAC-3')   |          |
| one generic IgG reverse primer,  | (5'-TCTTGTCCACCTTGGT GTTG-3')   |          |
| one specific IgG4 reverse primer | (5'-TACGTTGCAGGTGTA GGTCTTC-3') |          |

#### 1.5 Biological samples

| Description | Source | Identifier |
|-------------|--------|------------|
| N.A.        |        |            |

## 1.6 Deposited data

| Name of repository | Identifier | Link |
|--------------------|------------|------|
| N.A.               |            |      |

## 1.7 Software

| Software name        | Manufacturer | Version |
|----------------------|--------------|---------|
| LinRegPCR software15 |              |         |

## 1.8 Other (e.g. drugs, proteins, vectors etc.)

|                               |                                              |                                 |
|-------------------------------|----------------------------------------------|---------------------------------|
| SensiFAST SYBR Lo-ROX reagent | GC Biotech, Alphen aan den Rijn, Netherlands | catalog no. BIO-94005, Bioline; |
|                               |                                              |                                 |

## 1.9 Please provide the details of the corresponding methods author for the manuscript:

Prof. Dr. Niek de Vries, Department of Rheumatology & Clinical Immunology,  
Amsterdam UMC, University of Amsterdam;  
email: n.devries1@amsterdamumc.nl

## 2.0 Please confirm for randomised controlled trials all versions of the clinical protocol are included in the submission. These will be published online as supplementary information.

N.A.
